# Supplementary material for: Synthesis of highly active rGO-supported mono and bi-metallic nanocomposites as catalysts for chemoselective hydrogenation of α,β-unsaturated ketone to alcohol
Source: Royal Society of Chemistry journal article supplement (doi:10.1039/c7nj02669b), 2018-01-01
Supplement: c7nj02669b1.pdf [file c7nj02669b1.pdf]

**Synthesis of highly active rGO supported mono and bi-metallic nanocomposites as catalysts for chemoselective hydrogenation of  $\alpha$ ,  $\beta$ -unsaturated ketone to alcohol**

**K. Sivaranjan <sup>a</sup>, O. Padmaraj <sup>b</sup> and J. Santhanalakshmi <sup>a\*</sup>**

<sup>a</sup> Department of Physical Chemistry, University of Madras, Guindy Campus, Chennai-600 025

Tamilnadu, India.

<sup>b</sup> Department of Energy, University of Madras, Guindy Campus, Chennai-600 025, Tamilnadu, India.

\*E-mail: [kksivaranjan@gmail.com](mailto:kksivaranjan@gmail.com) and [drjslakshmi06@yahoo.co.in](mailto:drjslakshmi06@yahoo.co.in)

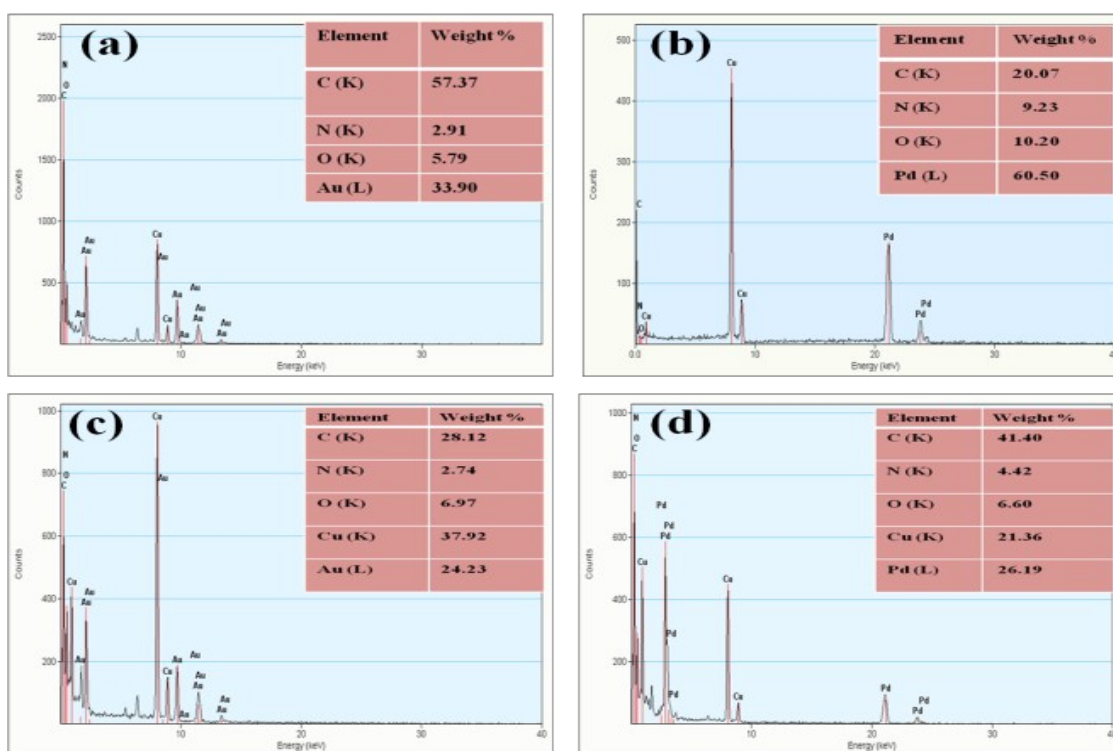

**Figure S1.** EDAX spectra of (a) Au/rGO (b) Pd/rGO (c) Cu-Au/rGO and (d) Cu-Pd/rGO NCs

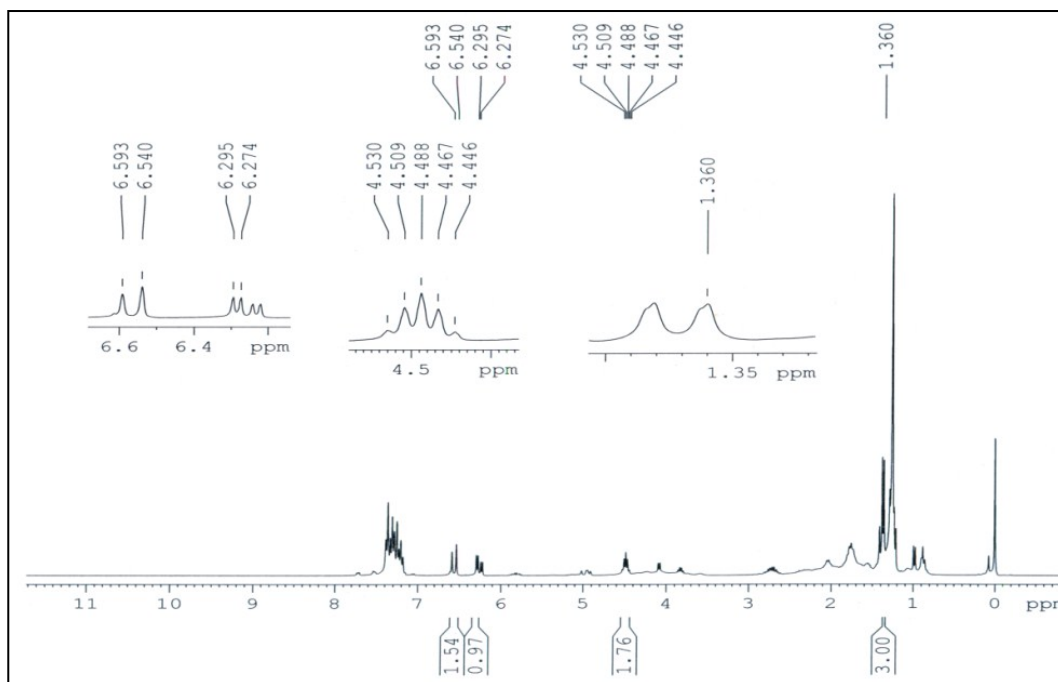

**Figure S2.**  $^1\text{H}$  NMR spectrum of the crude product arising from the hydrogenation of benzalacetone with the bi-metallic Cu-Pd/rGO NC catalyst

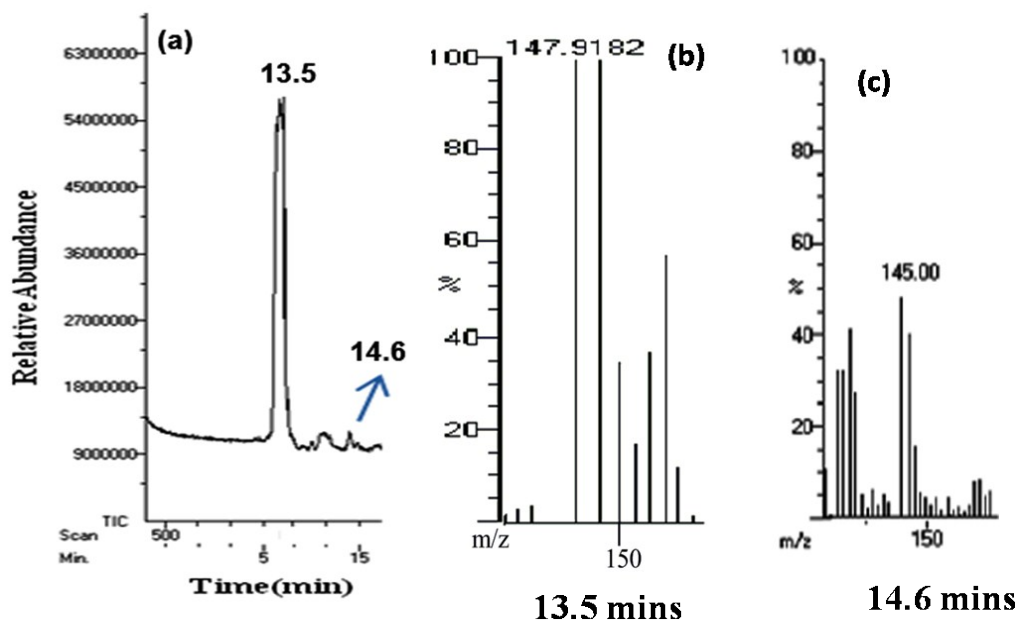

**Figure S3.** (a) GC and (b, c) mass spectra of the crude product obtained from the hydrogenation of benzalacetone with the bi-metallic Cu-Pd/rGO NC catalyst. Two species (unsaturated alcohol and residual starting material) are identified
